# Supplementary material for: Triglycerides as Biomarker for Predicting Systemic Lupus Erythematosus Related Kidney Injury of Negative Proteinuria
Source: MDPI journal article supplement (doi:10.3390/biom12070945), 2022-07-05
Supplement: s1 [file s1]

**Supplementary Table S1.** The association between triglycerides and renal function indexes in SLE-related kidney injury patients.

| <b>Renal function Indexes</b> | <b>Detect (n)</b> | <b>Triglycerides</b> | <b><i>p</i> Value</b> |
|-------------------------------|-------------------|----------------------|-----------------------|
| Renal biopsy                  | Yes (26)          | 2.98 (2.02–3.27)     | 0.004 **              |
|                               | No (47)           | 1.88 (1.41–2.67)     |                       |
| Creatinine > 108 μmol/L       | Yes (14)          | 2.43 (1.82–3.28)     | 0.643                 |
|                               | No (59)           | 1.93 (1.54–3.18)     |                       |
| Urine red blood cell > 5/HP   | Yes (50)          | 2.43 (1.66–3.24)     | 0.037 *               |
|                               | No (23)           | 1.78 (1.35–2.15)     |                       |
| P-CAST                        | Yes (56)          | 2.33 (1.70–3.24)     | 0.003 **              |
|                               | No (17)           | 1.58 (1.31–1.90)     |                       |

P-CAST: urine pathology cast; \*  $p < 0.05$ , \*\*  $p < 0.01$ .
